# Supplementary material for: Cloud water adjustments to aerosol perturbations are buffered by solar heating in non-precipitating marine stratocumuli
Source: Copernicus journal article supplement (doi:10.5194/egusphere-2024-1021), 2024-04-16
Supplement: Supplementary file 1 [file egusphere-2024-1021-supplement.pdf]

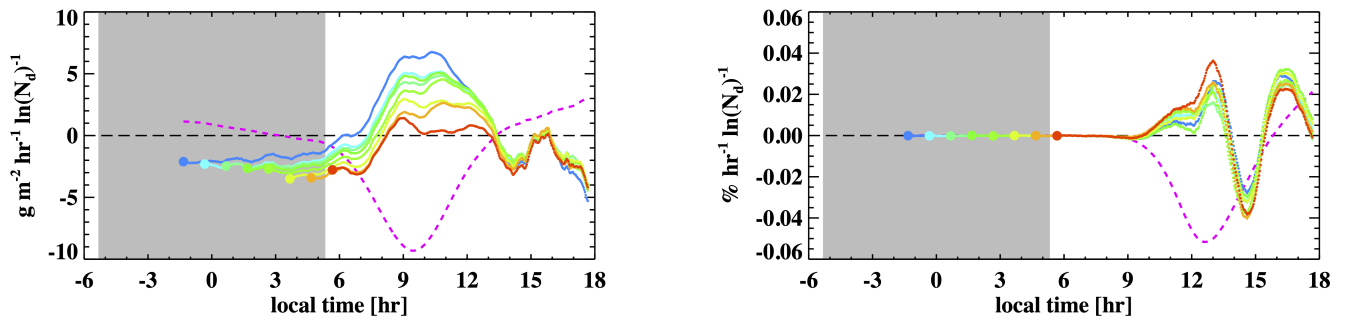

**Figure S1.** As in Fig. 2, but for diurnal cycles of the slope between  $N_d$  total LWP (left) and cloud fraction (right) tendencies. Colors separates groups mimicking “aerosol perturbation” at different times. Gray shading indicates nighttime hours. Dashed magenta lines indicate the ensemble-mean total LWP and cloud fraction tendencies.

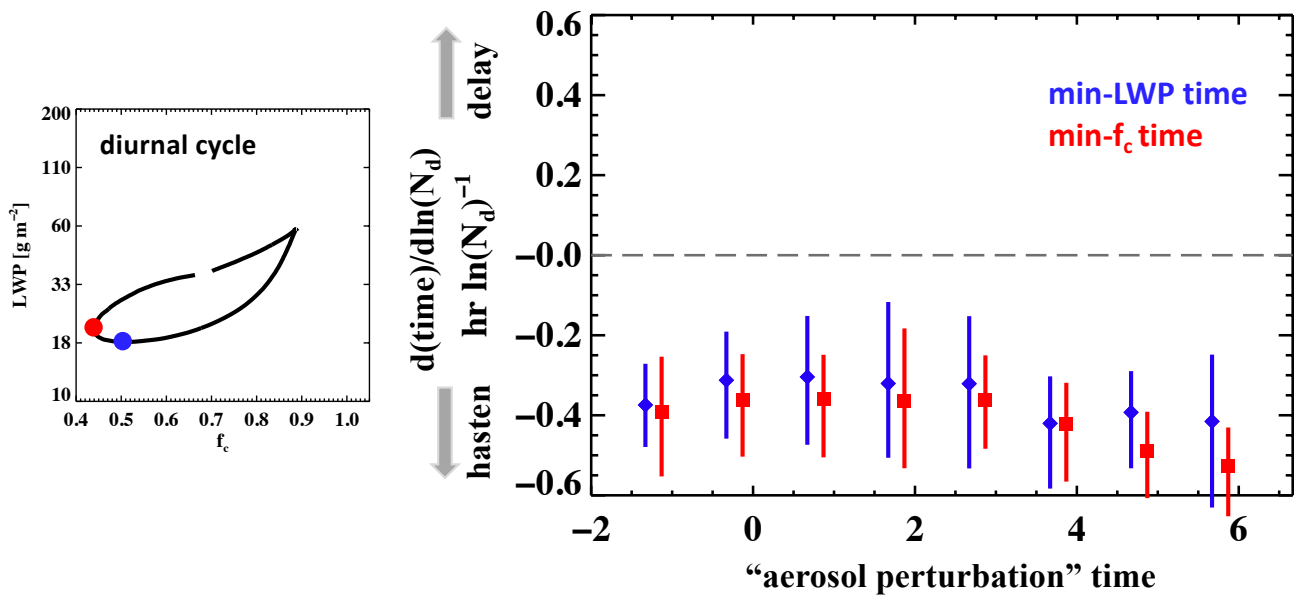

**Figure S2.** As in Fig. 6, but for the non-precipitating open-cell class.

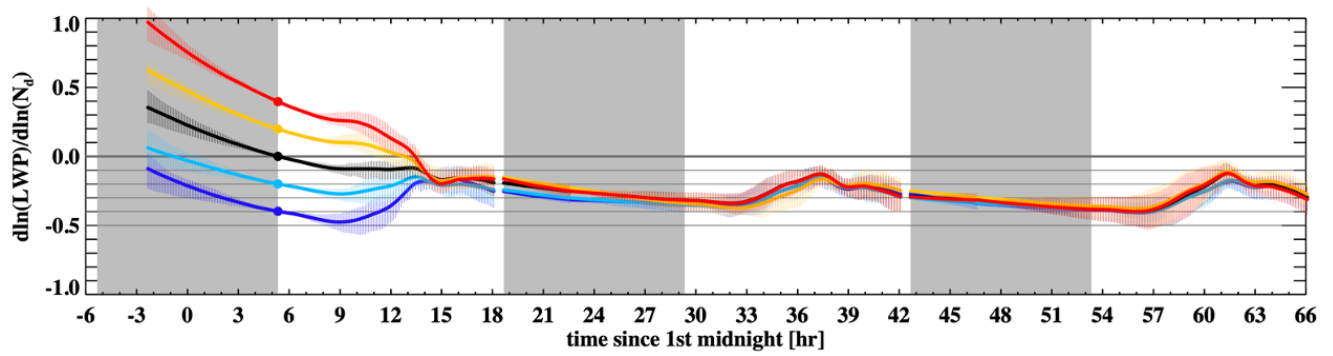

**Figure S3.** As in Fig. 1, but for 3 diurnal cycles. The 204 non-precipitating Sc simulations are reused for cMC subsampling to get the additional 2 diurnal cycles based on the  $N_d$ -LWP relationship of each group at the end of each day.
